# Supplementary material for: Iron biomarkers predict peripheral artery disease in females: a cross-sectional analysis of HEIST-DiC and NHANES participants
Source: bioRxiv or medRxiv preprint supplement (doi:10.1101/2023.08.21.23293418), 2024-11-12

**A**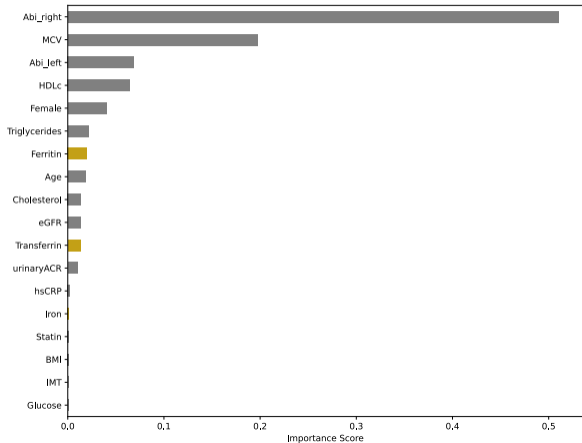**B**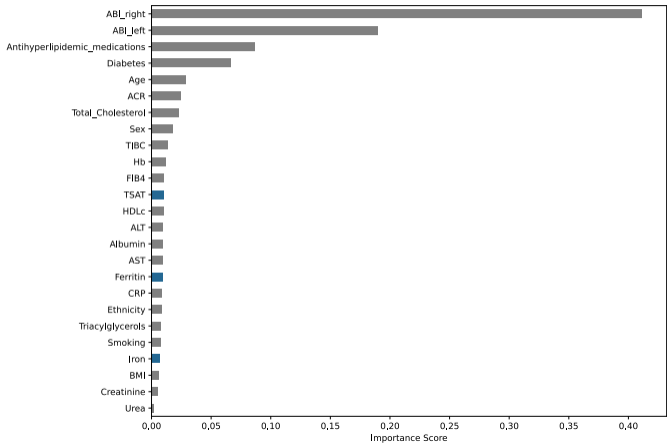

Supplement: Supplementary file [file media-3.pdf]
